# Supplementary material
Source: publisher figshare collection journal article supplement (https://acs.figshare.com/ndownloader/files/25035889)
Supplement: Supplementary file 1 [file 25035889]

## Sheet: Sheet1
Supplementary File S2 Viral proteins identified in PDCoV-infected IPEC-J2 cells
Checked	Protein FDR Confidence: Combined	Master	Accession	Description	Exp. q-value: Combined	Sum PEP Score	Coverage [%]	# Peptides	# PSMs	# Unique Peptides	# Protein Groups	# AAs	MW [kDa]	calc. pI	Score Sequest HT: Sequest HT	# Peptides (by Search Engine): Sequest HT	Abundance Ratio: (F1, 114) / (F1, 113)	Abundance Ratio: (F1, 115) / (F1, 113)	Abundance Ratio: (F1, 116) / (F1, 113)	Abundance Ratio: (F1, 119) / (F1, 113)	Abundance Ratio: (F1, 121) / (F1, 113)	Abundances (Scaled): F1: 113, Control	Abundances (Scaled): F1: 114, Sample	Abundances (Scaled): F1: 115, Sample	Abundances (Scaled): F1: 116, Sample	Abundances (Scaled): F1: 119, Sample	Abundances (Scaled): F1: 121, Sample	Abundances Count: F1: 113, Control	Abundances Count: F1: 114, Sample	Abundances Count: F1: 115, Sample	Abundances Count: F1: 116, Sample	Abundances Count: F1: 119, Sample	Abundances Count: F1: 121, Sample	Found in Sample: [S1] F1: 113, Control	Found in Sample: [S2] F1: 114, Sample	Found in Sample: [S3] F1: 115, Sample	Found in Sample: [S4] F1: 116, Sample	Found in Sample: [S5] F1: 119, Sample	Found in Sample: [S6] F1: 121, Sample	Modifications
FALSE	High	Master Protein	A0A1V0K0R8	Nucleocapsid protein OS=Porcine deltacoronavirus OX=1586324 PE=4 SV=1	0	266.279	64	23	311	2	1	342	37.6	10.15	1066.91	23	0.969	1.076	4.898	4.74	4.589	34.7	33.7	37.4	170.2	164.7	159.4	4	4	4	4	4	4	High	High	High	High	High	High	Met-loss [N-Term]
FALSE	High	Master Protein	A0A1P8VJV9	Nucleocapsid protein OS=Porcine deltacoronavirus OX=1586324 GN=N PE=4 SV=1	0	198.799	62	22	276	1	1	342	37.7	10.15	899.48	22	0.926	0.955	1.264	1.326	1.433	86.9	80.4	83	109.8	115.3	124.5	1	1	1	1	1	1	High	High	High	High	High	High	Met-loss [N-Term]
FALSE	High	Master Protein	A0A1L3HEF1	Nucleocapsid protein OS=Porcine deltacoronavirus OX=1586324 GN=N PE=4 SV=1	0	195.771	63	22	275	1	1	342	37.6	10.15	893.21	22	0.948	1.05	1.425	1.339	1.259	85.5	81	89.7	121.8	114.5	107.6	1	1	1	1	1	1	High	High	High	High	High	High	Met-loss [N-Term]
FALSE	High	Master Protein	A0A4P8D759	Spike protein OS=Porcine deltacoronavirus OX=1586324 PE=4 SV=1	0	178.124	20	17	80	1	1	1159	128	6.11	323.13	17	0.9	1.004	3.164	3.165	3.086	48.7	43.8	48.9	154.1	154.1	150.3	2	2	2	2	2	2	High	High	High	High	High	High
FALSE	High	Master Protein	A0A172PY65	Spike glycoprotein OS=Porcine deltacoronavirus OX=1586324 PE=4 SV=1	0	145.132	18	16	76	1	1	1159	128	5.96	292.89	16	0.961	1.094	1.489	1.511	1.424	80.2	77.1	87.8	119.5	121.2	114.2	1	1	1	1	1	1	High	High	High	High	High	High
FALSE	High	Master Protein	A0A223DMX0	Spike protein OS=Porcine deltacoronavirus OX=1586324 GN=S PE=4 SV=1	0	136.292	17	15	65	1	1	1159	128.1	6.14	271.65	15	0.888	0.971	1.518	1.508	1.508	81.2	72.1	78.8	123.2	122.4	122.4	1	1	1	1	1	1	High	High	High	High	High	High
FALSE	High	Master Protein	A0A0E3U220	Membrane protein OS=Porcine deltacoronavirus OX=1586324 GN=M PE=4 SV=1	0	146.038	48	8	117	8	1	217	24.5	9.28	537.05	8	0.967	1.076	3.508	3.817	3.65	42.8	41.4	46.1	150.1	163.4	156.2	11	11	11	11	11	11	High	High	High	High	High	High
FALSE	High	Master Protein	A0A343ERC7	3C-like proteinase OS=Porcine deltacoronavirus OX=1586324 GN=ORF1ab PE=3 SV=1	0	61.217	4	14	18	14	1	6267	699.4	6.64	59.12	14	0.904	1.04	1.493	1.499	1.496	80.7	73	84	120.5	121	120.8	14	14	14	14	14	14	High	High	High	High	High	High
FALSE	High	Master Protein	A0A2H5A4I5	NS7 protein OS=Porcine deltacoronavirus OX=1586324 GN=NS7 PE=4 SV=1	0	38.962	32	4	13	4	1	200	22.4	9.25	59.48	4	0.906	1.077	2.536	2.673	2.65	55.3	50.1	59.6	140.3	147.9	146.7	4	4	4	4	4	4	High	High	High	High	High	High
FALSE	High	Master Protein	A0A0K2D1N4	NS6 protein OS=Porcine deltacoronavirus OX=1586324 GN=NS6 PE=2 SV=1	0	29.959	51	4	6	4	1	94	10.8	7.21	27.22	4	0.937	1	2.963	3.12	2.915	50.3	47.1	50.3	148.9	156.9	146.6	4	4	4	4	4	4	High	High	High	High	High	High
